# Supplementary material for: Polymorphism in the aggressive mimicry lure of the parasitic freshwater mussel Lampsilis fasciola
Source: PeerJ journal article supplement (doi:10.7717/peerj.17359), 2024-05-24
Supplement: supplementary_materials.pdf [file supplementary_materials.pdf]

Supporting Information for

**Polymorphism in the aggressive mimicry lure of the parasitic freshwater mussel *Lampsilis fasciola***

Supplementary Table 1: Museum ID numbers, Raw reads, total clusters, and total loci in assembly from the ddRAD sequencing are displayed for each genotyped sample of *Lampsilis fasciola* and of the outgroup taxa. Individual *Lampsilis fasciola* lure phenotype designation followed Zanatta et al. (2007).

| Sample Name            | Museum ID |           |           | Lure Phenotype | Raw reads | Total clusters | Average clustering depth | Loci in assembly |
|------------------------|-----------|-----------|-----------|----------------|-----------|----------------|--------------------------|------------------|
| L_fasciola_AL_brood_1  | 306443    | 306443-1  | 306444-1  | Worm-like      | 258664    | 97681          | 2.14                     | 483              |
| L_fasciola_AL_brood_2  | 306444    | 306443-2  | 306443-1  | Darter-like    | 5201836   | 1120710        | 3.28                     | 25686            |
| L_fasciola_AL_brood_3  | 306445    | 306443-3  | 306444-2  | Worm-like      | 5492519   | 1126749        | 3.4                      | 25703            |
| L_fasciola_AL_brood_4  | 306446    | 306443-4  | 306443-2  | Darter-like    | 2429494   | 632254         | 2.84                     | 21398            |
| L_fasciola_AL_brood_5  | 306447    | 306443-5  | 306444-3  | Worm-like      | 3152003   | 760260         | 3.02                     | 23761            |
| L_fasciola_AL_brood_6  | 306448    | 306443-6  | 306443-3  | Darter-like    | 3212851   | 810898         | 2.87                     | 23434            |
| L_fasciola_AL_brood_7  | 306449    | 306443-7  | 306443-4  | Darter-like    | 3649891   | 593765         | 4.22                     | 25363            |
| L_fasciola_AL_brood_8  | 306450    | 306443-8  | 306443-5  | Darter-like    | 4869307   | 1462723        | 2.29                     | 19089            |
| L_fasciola_AL_brood_9  | 306451    | 306443-9  | 306444-4  | Worm-like      | 3158818   | 718169         | 3.08                     | 23033            |
| L_fasciola_AL_brood_10 | 306452    | 306443-10 | 306443-6  | Darter-like    | 4000321   | 915881         | 3.12                     | 24916            |
| L_fasciola_AL_brood_11 | 306453    | 306443-11 | 306444-5  | Worm-like      | 5679854   | 1171842        | 3.35                     | 25770            |
| L_fasciola_AL_brood_12 | 306454    | 306443-12 | 306443-7  | Darter-like    | 4212783   | 979265         | 3.04                     | 24693            |
| L_fasciola_AL_brood_13 | 306455    | 306443-13 | 306444-6  | Worm-like      | 1300563   | 399134         | 2.51                     | 12145            |
| L_fasciola_AL_brood_14 | 306456    | 306443-14 | 306443-8  | Darter-like    | 4100372   | 1043360        | 2.79                     | 23521            |
| L_fasciola_AL_brood_15 | 306457    | 306443-15 | 306443-9  | Darter-like    | 5804293   | 1412102        | 2.91                     | 25570            |
| L_fasciola_AL_brood_16 | 306458    | 306443-16 | 306444-7  | Worm-like      | 1555906   | 427061         | 2.7                      | 14099            |
| L_fasciola_AL_brood_17 | 306459    | 306443-17 | 306443-10 | Darter-like    | 2073968   | 598680         | 2.59                     | 13668            |
| L_fasciola_AL_brood_18 | 306460    | 306443-18 | 306444-8  | Worm-like      | 6919783   | 1574429        | 3.08                     | 25811            |
| L_fasciola_AL_brood_19 | 306461    | 306443-19 | 306443-11 | Darter-like    | 3434210   | 829507         | 2.94                     | 23708            |
| L_fasciola_AL_brood_20 | 306462    | 306443-20 | 306443-12 | Darter-like    | 4778853   | 994416         | 3.35                     | 25500            |
| L_fasciola_AL_brood_21 | 306463    | 306443-21 | 306444-9  | Worm-like      | 2462560   | 590095         | 2.91                     | 20588            |
| L_fasciola_AL_brood_22 | 306464    | 306443-22 | 306444-10 | Worm-like      | 6600876   | 1406451        | 3.26                     | 26080            |
| L_fasciola_AL_brood_23 | 306465    | 306443-23 | 306443-13 | Darter-like    | 7090859   | 1628965        | 3.06                     | 25932            |

|                        |        |           |           |             |         |         |      |       |
|------------------------|--------|-----------|-----------|-------------|---------|---------|------|-------|
| L_fasciola_AL_brood_24 | 306466 | 306443-24 | 306444-11 | Worm-like   | 4546435 | 1061394 | 3    | 24174 |
| L_fasciola_AL_brood_25 | 306467 | 306443-25 | 306444-12 | Worm-like   | 5379577 | 1135906 | 3.35 | 25703 |
| L_fasciola_AL_brood_26 | 306468 | 306443-26 | 306444-13 | Worm-like   | 5592652 | 1501130 | 2.67 | 23965 |
| L_fasciola_AL_brood_27 | 306469 | 306443-27 | 306444-14 | Worm-like   | 4893957 | 825855  | 4.09 | 25924 |
| L_fasciola_AL_brood_28 | 306470 | 306443-28 | 306443-14 | Darter-like | 2596873 | 519103  | 3.59 | 22103 |
| L_fasciola_AL_brood_29 | 306471 | 306443-29 | 306443-15 | Darter-like | 3401334 | 883485  | 2.87 | 21377 |
| L_fasciola_AL_brood_30 | 306472 | 306443-30 | 306444-15 | Worm-like   | 3876395 | 1014133 | 2.8  | 22072 |
| L_fasciola_AL_brood_31 | 306473 | 306443-31 | 306444-16 | Worm-like   | 5391442 | 1246528 | 3.07 | 25009 |
| L_fasciola_AL_brood_32 | 306474 | 306443-32 | 306443-16 | Darter-like | 4365005 | 1084596 | 2.85 | 23030 |
| L_fasciola_AL_brood_33 | 306475 | 306443-33 | 306443-17 | Darter-like | 5116507 | 1117916 | 3.16 | 24667 |
| L_fasciola_AL_brood_34 | 306476 | 306443-34 | 306443-18 | Darter-like | 7480755 | 1601100 | 3.19 | 26163 |
| L_fasciola_AL_brood_35 | 306477 | 306443-35 | 306443-19 | Darter-like | 8121426 | 1825135 | 3.02 | 25972 |
| L_fasciola_AL_brood_36 | 306478 | 306443-36 | 306443-20 | Darter-like | 5521997 | 1414238 | 2.78 | 24163 |
| L_fasciola_AL_brood_37 | 306479 | 306443-37 | 306443-21 | Darter-like | 6562641 | 1579514 | 2.88 | 25476 |
| L_fasciola_AL_brood_38 | 306480 | 306443-38 | 306443-22 | Darter-like | 6303766 | 1596624 | 2.76 | 24448 |
| L_fasciola_AL_brood_39 | 306481 | 306443-39 | 306443-23 | Darter-like | 6206795 | 1488925 | 2.91 | 24648 |
| L_fasciola_AL_brood_40 | 306482 | 306443-40 | 306443-24 | Darter-like | 8630897 | 1891164 | 3.11 | 26176 |
| L_fasciola_AL_brood_41 | 306483 | 306443-41 | 306443-25 | Darter-like | 7293683 | 1716571 | 2.95 | 25604 |
| L_fasciola_AL_brood_42 | 306484 | 306443-42 | 306443-26 | Darter-like | 4896252 | 1193262 | 2.88 | 22829 |
| L_fasciola_AL_brood_43 | 306485 | 306443-43 | 306443-27 | Darter-like | 6098052 | 1471714 | 2.9  | 25074 |
| L_fasciola_AL_brood_44 | 306486 | 306443-44 | 306443-28 | Darter-like | 7495994 | 1698871 | 3.04 | 25701 |
| L_fasciola_AL_brood_45 | 306487 | 306443-45 | 306443-29 | Darter-like | 3937758 | 670698  | 4.06 | 24947 |
| L_fasciola_AL_brood_46 | 306488 | 306443-46 | 306443-30 | Darter-like | 6370942 | 1343655 | 3.26 | 25855 |
| L_fasciola_AL_brood_47 | 306489 | 306443-47 | 306443-31 | Darter-like | 5542864 | 1318463 | 2.96 | 24550 |
| L_fasciola_AL_brood_48 | 306490 | 306443-48 | 306443-32 | Darter-like | 6313913 | 1469606 | 2.98 | 24983 |
| L_fasciola_AL_brood_49 | 306491 | 306443-49 | 306443-33 | Darter-like | 3163000 | 789239  | 2.9  | 24776 |
| L_fasciola_AL_brood_50 | 306492 | 306443-50 | 306443-34 | Darter-like | 1728370 | 548529  | 2.35 | 17837 |
| L_fasciola_Huron_5     | 306493 | 306444-1  | 306445-1  | Darter-like | 953302  | 259898  | 2.8  | 10996 |
| L_fasciola_Huron_6     | 306494 | 306444-2  | 306446-1  | Worm-like   | 1682931 | 362706  | 3.31 | 16809 |

|                      |        |           |           |             |          |         |      |       |
|----------------------|--------|-----------|-----------|-------------|----------|---------|------|-------|
| L_fasciola_Huron_7   | 306495 | 306444-3  | 306446-2  | Worm-like   | 746944   | 157212  | 3.29 | 10644 |
| L_fasciola_Huron_8   | 306496 | 306444-4  | 306446-3  | Worm-like   | 1899689  | 402515  | 3.25 | 16584 |
| L_fasciola_Huron_9   | 306497 | 306444-5  | 306445-2  | Darter-like | 1213655  | 293090  | 2.97 | 11818 |
| L_fasciola_Huron_10  | 306498 | 306444-6  | 306445-3  | Darter-like | 7775910  | 1275602 | 3.87 | 22035 |
| L_fasciola_Huron_11  | 306499 | 306444-7  | 306445-4  | Darter-like | 1533281  | 295767  | 3.55 | 15386 |
| L_fasciola_NC_1      | 306500 | 306445-1  | 306447-1  | Darter-like | 1308813  | 254002  | 3.61 | 11873 |
| L_fasciola_NC_2      | 306501 | 306445-2  | 306447-2  | Darter-like | 4862573  | 852380  | 3.77 | 18321 |
| L_fasciola_NC_3      | 306502 | 306445-3  | 306447-3  | Darter-like | 663874   | 165869  | 2.95 | 9960  |
| L_fasciola_NC_4      | 306503 | 306445-4  | 306447-4  | Darter-like | 2610453  | 465228  | 3.76 | 13790 |
| L_fasciola_NC_5      | 306504 | 306445-5  | 306447-5  | Darter-like | 6927947  | 1459334 | 3.05 | 20804 |
| L_fasciola_NC_6      | 306505 | 306445-6  | 306447-6  | Darter-like | 1051195  | 202171  | 3.27 | 12415 |
| L_fasciola_NC_7      | 306506 | 306445-7  | 306447-7  | Darter-like | 1948092  | 382878  | 3.61 | 17101 |
| L_fasciola_NC_8      | 306507 | 306445-8  | 306447-8  | Darter-like | 3475751  | 669278  | 3.69 | 20683 |
| L_fasciola_NC_9      | 306508 | 306445-9  | 306447-9  | Darter-like | 5693936  | 1634946 | 2.46 | 22325 |
| L_fasciola_NC_10     | 306509 | 306445-10 | 306447-10 | Darter-like | 2175381  | 464794  | 3.38 | 17094 |
| L_fasciola_NC_11     | 306510 | 306445-11 | 306447-11 | Darter-like | 2189933  | 516643  | 3.05 | 17580 |
| L_fasciola_Redo_1    | 306511 | 306446-1  | 306448-1  | Darter-like | 1455864  | 327622  | 2.62 | 13478 |
| L_fasciola_Redo_2    | 306512 | 306446-2  | 306448-2  | Darter-like | 1839020  | 436418  | 2.43 | 13181 |
| L_fasciola_Raisin_2  | 306513 | 306447-1  | 306449-1  | Darter-like | 8235827  | 1716137 | 3.29 | 25555 |
| L_fasciola_Raisin_3  | 306514 | 306447-2  | 306449-2  | Darter-like | 6032935  | 1488448 | 2.85 | 25006 |
| L_fasciola_Raisin_4  | 306515 | 306447-3  | 306449-3  | Darter-like | 12947164 | 3587458 | 2.45 | 25245 |
| L_fasciola_Raisin_1  | 306516 | 306447-4  | 306449-4  | Darter-like | 6639384  | 1086218 | 3.97 | 23458 |
| L_fasciola_Raisin_5  | 306517 | 306447-5  | 306449-5  | Darter-like | 10059843 | 1997619 | 3.41 | 25363 |
| L_fasciola_Raisin_6  | 306518 | 306447-6  | 306449-6  | Darter-like | 8019689  | 1847955 | 3.01 | 25769 |
| L_fasciola_Raisin_7  | 306519 | 306447-7  | 306449-7  | Darter-like | 3816242  | 681697  | 3.95 | 24606 |
| L_fasciola_Raisin_8  | 306520 | 306447-8  | 306449-8  | Darter-like | 6117037  | 1282299 | 3.27 | 22439 |
| L_fasciola_Raisin_9  | 306521 | 306447-9  | 306450-1  | Worm-like   | 5170380  | 775979  | 4.64 | 25798 |
| L_fasciola_Raisin_10 | 306522 | 306447-10 | 306449-9  | Darter-like | 761451   | 176858  | 3.14 | 11477 |
| L_fasciola_Raisin_11 | 306523 | 306447-11 | 306450-2  | Worm-like   | 7140657  | 1670143 | 2.97 | 25519 |

|                        |        |           |           |             |          |         |       |       |
|------------------------|--------|-----------|-----------|-------------|----------|---------|-------|-------|
| L_fasciola_Raisin_12   | 306524 | 306447-12 | 306449-10 | Darter-like | 890521   | 203114  | 2.91  | 10582 |
| L_fasciola_Raisin_13   | 306525 | 306447-13 | 306449-11 | Darter-like | 1071361  | 225030  | 3.47  | 13512 |
| L_fasciola_Raisin_14   | 306526 | 306447-14 | 306449-12 | Darter-like | 3644379  | 946273  | 2.82  | 21995 |
| L_fasciola_Raisin_15   | 306527 | 306447-15 | 306449-13 | Darter-like | 3578043  | 482446  | 5.04  | 17514 |
| L_fasciola_Raisin_16   | 306528 | 306447-16 | 306449-14 | Darter-like | 2351544  | 114072  | 14.25 | 516   |
| L_fasciola_Raisin_17   | 306529 | 306447-17 | 306449-15 | Darter-like | 5272816  | 1304726 | 2.87  | 23305 |
| L_fasciola_Huron_1     | 306530 | 306448-1  | 306452    | Worm-like   | 13366692 | 4050829 | 2.26  | 17555 |
| L_fasciola_Huron_2     | 306531 | 306448-2  | 306451-1  | Darter-like | 2819896  | 928226  | 2.24  | 20205 |
| L_fasciola_Huron_3     | 306532 | 306448-3  | 306451-2  | Darter-like | 662275   | 186602  | 2.66  | 7653  |
| L_fasciola_Huron_4     | 306533 | 306448-4  | 306451-3  | Darter-like | 4792093  | 855457  | 3.88  | 24512 |
| L_fasciola_AL_mom_1_10 | 306534 | 306449-1  | 306453-1  | Darter-like | 8095030  | 1840917 | 2.95  | 25420 |
| L_fasciola_AL_mom_2_21 | 306535 | 306449-2  | 306453-2  | Darter-like | 10329331 | 3504027 | 2.03  | 24488 |
| L_fasciola_AL_mom_3_16 | 306536 | 306449-3  | 306453-3  | Darter-like | 10384477 | 2987559 | 2.34  | 25056 |
| L_fasciola_Huron_12    | 306537 | 306450-1  | 306454-1  | Worm-like   | 6906349  | 1672394 | 2.87  | 25281 |
| L_fasciola_Huron_13    | 306538 | 306450-2  | 306454-2  | Worm-like   | 6955496  | 1670627 | 2.88  | 25593 |
| L_fasciola_Raisin_18   | 306539 | 306450-3  | 306454-3  | Worm-like   | 5506215  | 1301878 | 3     | 25373 |
| L_fasciola_Raisin_19   | 306540 | 306451-1  | 306455-1  | Worm-like   | 6611596  | 1524682 | 3.03  | 25604 |
| L_fasciola_Raisin_20   | 306541 | 306451-2  | 306455-2  | Worm-like   | 4894495  | 1276608 | 2.74  | 24931 |
| L_fasciola_Raisin_21   | 306542 | 306451-3  | 306455-3  | Worm-like   | 8396562  | 1736736 | 3.26  | 25490 |
| L_cardium_1            | 306543 | 306452-1  | 306456-1  |             | 6864226  | 1710220 | 2.8   | 14625 |
| L_cardium_2            | 306544 | 306452-2  | 306456-2  |             | 4898330  | 1091622 | 3.11  | 13433 |
| L_cardium_3            | 306545 | 306452-3  | 306456-3  |             | 7109883  | 2005565 | 2.5   | 14563 |
| L_cardium_4            | 306546 | 306452-4  | 306456-4  |             | 4637077  | 997208  | 3.27  | 13860 |
| S_nasuta_1             | 306547 | 306453    | 306457    |             | 4544989  | 1169260 | 2.55  | 10441 |

Supplementary Table 2: Summary of the sex and lure phenotypes of all 57 University of Michigan Museum of Zoology *Lampsilis fasciola* individuals present in 8 separate mid-20<sup>th</sup> century collections made from the River Raisin at Sharon Mills County Park (Fig. 2a).

| Collection Date | Male darter-like | Male worm-like | Female darter-like | Female worm-like | Total darter-like | Total worm-like | Total |
|-----------------|------------------|----------------|--------------------|------------------|-------------------|-----------------|-------|
| 9/30/54         | 2                | 1              | 5                  | 1                | 7                 | 2               | 9     |
| 5/21/58         | 0                | 0              | 4                  | 0                | 4                 | 0               | 4     |
| 7/28/59         | 0                | 0              | 2                  | 0                | 2                 | 0               | 2     |
| 4/24/62         | 3                | 0              | 3                  | 0                | 6                 | 0               | 6     |
| 5/10/62         | 5                | 1              | 4                  | 1                | 9                 | 2               | 11    |
| 6/19/62         | 4                | 2              | 1                  | 0                | 5                 | 2               | 7     |
| 6/25/62         | 3                | 1              | 2                  | 0                | 5                 | 1               | 6     |
| 7/20/62         | 5                | 1              | 5                  | 1                | 10                | 2               | 12    |

Supplementary Table 3: Summary data on individual mantle lure display field recordings. Video recordings were taken during the summer of 2018 at Sharon Mills (Fig. 2a) and Hudson Mills (Fig. 2b). Average movement length and interval was calculated from frame number from a 120fps video recording using a Go Pro Hero 6.

| File     | Average Movement duration (L) | Average Movement duration (R) | Average Interval (L) | Average Interval (R) | Interval Standard Deviation (L) | Interval Standard Deviation (R) | Proportion of Movements Synchronized | Lure Phenotype | Time  | Temperature °C | Date    | Site         |
|----------|-------------------------------|-------------------------------|----------------------|----------------------|---------------------------------|---------------------------------|--------------------------------------|----------------|-------|----------------|---------|--------------|
| GH010073 | 0.18                          | 0.18                          | 1.50                 | 1.99                 | 1.28                            | 1.65                            | 0.44                                 | "leech"        | 11:26 | 16.4           | 7/10/18 | Hudson Mills |
| GH010074 | 0.14                          | 0.14                          | 1.72                 | 1.69                 | 1.73                            | 1.73                            | 0.56                                 | "leech"        | 14:09 | 18.5           | 7/9/18  | Sharon Mills |
| GH010599 | 0.22                          | 0.23                          | 13.17                | 8.71                 | 20.34                           | 19.34                           | 0.04                                 | "darter"       | 11:29 | 18.3           | 7/10/18 | Hudson Mills |
| GH010601 | 0.21                          | 0.22                          | 1.02                 | 1.25                 | 0.52                            | 0.33                            | 0.48                                 | "leech"        | NA    | NA             | 7/10/18 | Hudson Mills |
| GH010602 | 0.17                          | 0.17                          | 1.19                 | 1.52                 | 0.62                            | 0.69                            | 0.32                                 | "leech"        | 13:36 | 20.6           | 7/10/18 | Hudson Mills |
| GH010603 | 0.23                          | 0.21                          | 1.20                 | 1.14                 | 1.22                            | 1.10                            | 0.24                                 | "darter"       | 13:57 | 20.5           | 7/10/18 | Hudson Mills |
| GH010075 | 0.15                          | 0.15                          | 1.77                 | 1.58                 | 1.79                            | 1.78                            | 0.27                                 | "leech"        | 2:48  | 18.2           | 7/9/18  | Sharon Mills |
| GH010598 | 0.27                          | 0.27                          | 1.80                 | 1.75                 | 1.19                            | 1.17                            | 0.80                                 | "darter"       | 11:18 | 18.2           | 7/10/18 | Hudson Mills |
| GH010597 | 0.31                          | 0.30                          | 1.30                 | 1.27                 | 0.57                            | 0.50                            | 0.93                                 | "leech"        | 11:06 | 18.1           | 7/10/18 | Hudson Mills |
| GH010595 | 0.22                          | 0.22                          | 1.51                 | 1.99                 | 1.17                            | 1.04                            | 0.42                                 | "leech"        | 10:34 | 17.6           | 7/10/18 | Hudson Mills |
| GH010056 | 0.24                          | 0.24                          | 3.12                 | 3.00                 | 1.89                            | 2.26                            | 0.38                                 | "darter"       | 12:59 | 21.3           | 6/11/18 | Sharon Mills |
| GH010077 | 0.19                          | 0.22                          | 1.83                 | 1.66                 | 1.91                            | 1.76                            | 0.18                                 | "darter"       | 11:26 | 16.4           | 7/10/18 | Hudson Mills |
| GH010055 | 0.29                          | 0.29                          | 2.34                 | 2.34                 | 1.32                            | 1.31                            | 0.60                                 | "darter"       | 11:59 | 21.8           | 6/11/18 | Sharon Mills |
| GH010016 | 0.35                          | 0.37                          | 1.83                 | 1.81                 | 0.50                            | 0.47                            | 0.53                                 | "darter"       | NA    | NA             | 6/12/18 | Sharon Mills |
| GH010057 | 0.30                          | 0.26                          | 9.87                 | 7.40                 | 11.22                           | 8.65                            | 0.30                                 | "darter"       | 13:16 | 21.4           | 6/11/18 | Sharon Mills |
| GH010593 | 0.15                          | 0.15                          | 0.99                 | 0.88                 | 0.58                            | 0.59                            | 0.39                                 | "leech"        | 14:09 | 20.7           | 7/9/18  | Sharon Mills |
| GH010062 | 0.14                          | 0.14                          | 2.27                 | 2.77                 | 1.76                            | 1.84                            | 0.24                                 | "darter"       | 10:21 | 19.2           | 7/4/18  | Hudson Mills |
| GH010064 | 0.17                          | 0.18                          | 1.10                 | 1.10                 | 0.42                            | 0.42                            | 0.98                                 | "leech"        | NA    | 20.8           | 7/4/18  | Hudson Mills |
| GH010065 | 0.12                          | 0.13                          | 1.21                 | 1.66                 | 0.92                            | 0.83                            | 0.45                                 | "darter"       | 14:23 | 21             | 7/4/18  | Hudson Mills |
| GH010063 | 0.14                          | 0.14                          | 1.05                 | 1.05                 | 0.29                            | 0.31                            | 0.82                                 | "darter"       | 11:13 | 19.6           | 7/4/18  | Hudson Mills |
| GH010579 | 0.12                          | 0.12                          | 0.88                 | 1.29                 | 0.55                            | 0.47                            | 0.26                                 | "leech"        | 11:02 | 20             | 7/4/18  | Hudson Mills |
| GH010580 | 0.13                          | 0.13                          | 1.56                 | 1.82                 | 1.13                            | 1.43                            | 0.67                                 | "leech"        | 11:52 | 21.3           | 7/4/18  | Hudson Mills |
| GH010581 | 0.18                          | 0.18                          | 2.17                 | 2.51                 | 5.16                            | 5.67                            | 0.54                                 | "leech"        | 13:36 | 23.3           | 7/4/18  | Hudson Mills |
| GH010582 | 0.10                          | 0.11                          | 1.94                 | 2.16                 | 2.76                            | 2.79                            | 0.19                                 | "darter"       | 14:18 | 23.4           | 7/4/18  | Hudson Mills |
| GH010583 | 0.11                          | 0.12                          | 0.99                 | 1.12                 | 0.91                            | 0.82                            | 0.60                                 | "darter"       | 14:52 | NA             | 7/4/18  | Hudson Mills |
| GH010068 | 0.12                          | 0.11                          | 2.79                 | 2.73                 | 2.71                            | 2.37                            | 0.41                                 | "darter"       | NA    | NA             | 6/12/18 | Sharon Mills |
| GH010048 | 0.15                          | 0.14                          | 8.05                 | 7.67                 | 5.94                            | 5.60                            | 0.39                                 | "darter"       | NA    | NA             | 6/7/18  | Sharon Mills |
| GH010060 | 0.17                          | 0.17                          | 0.28                 | 0.28                 | 0.01                            | 0.01                            | 1.00                                 | cardium        | NA    | NA             | 6/5/20  | Sharon Mills |
| GH010163 | 0.23                          | 0.23                          | 0.55                 | 0.55                 | 0.12                            | 0.12                            | 1.00                                 | cardium        | NA    | NA             | 6/5/20  | Sharon Mills |
| GH010620 | 0.25                          | 0.25                          | 0.48                 | 0.48                 | 0.05                            | 0.05                            | 1.00                                 | cardium        | NA    | NA             | 5/31/21 | Sharon Mills |
| GH010618 | 0.25                          | 0.25                          | 0.41                 | 0.41                 | 0.10                            | 0.10                            | 1.00                                 | cardium        | NA    | NA             | 6/1/21  | Sharon Mills |

Group 1

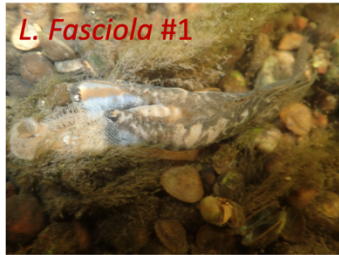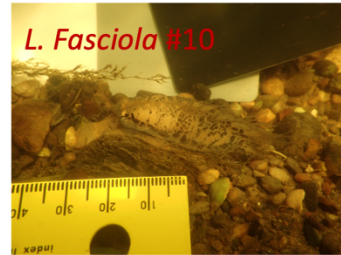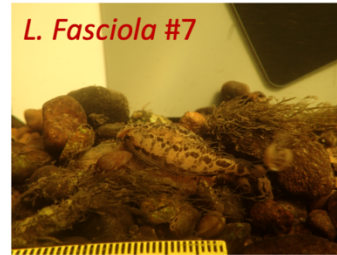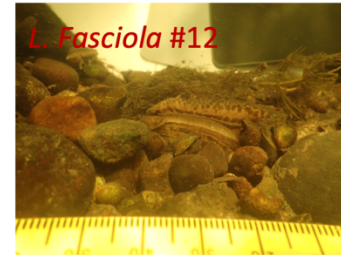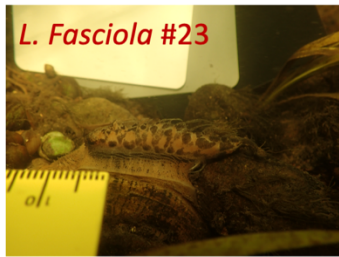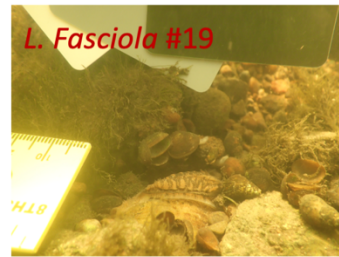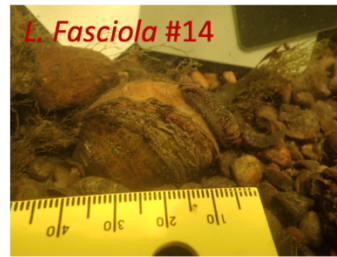

Group 2

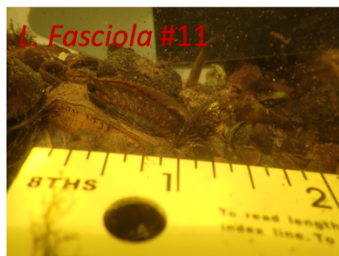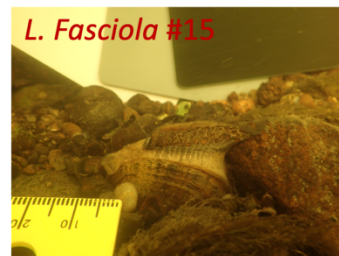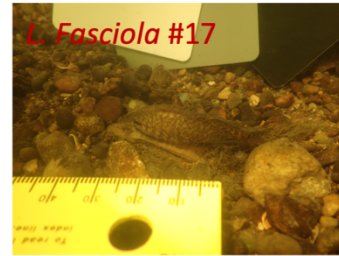



Group 3

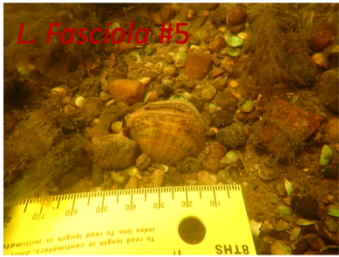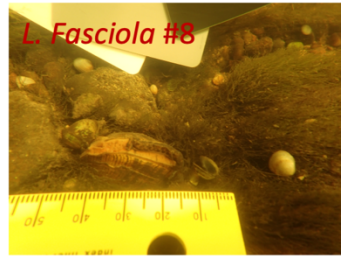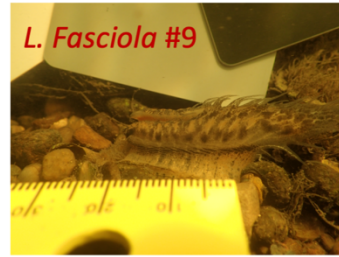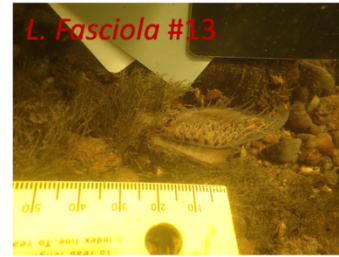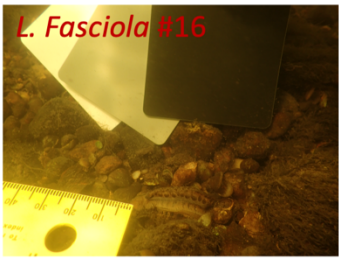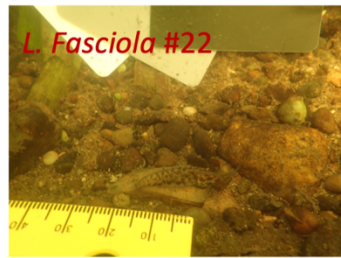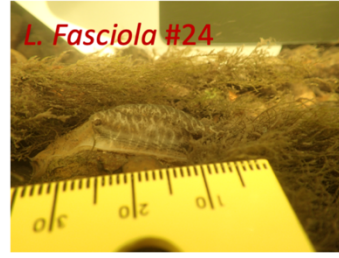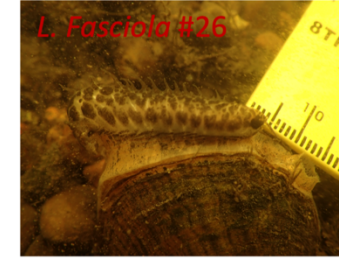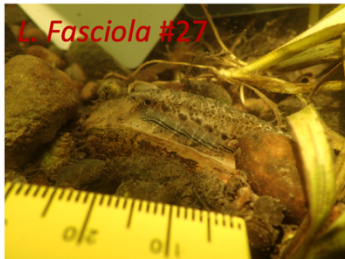

Group 4

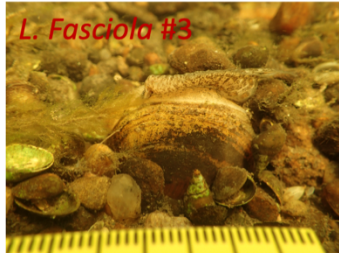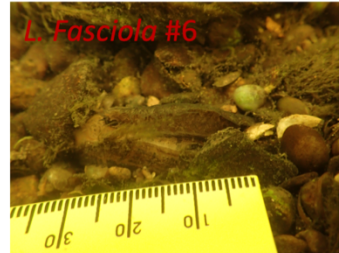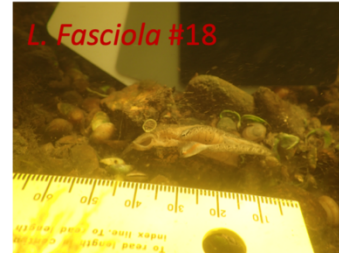

Group 5

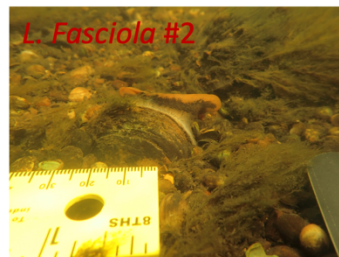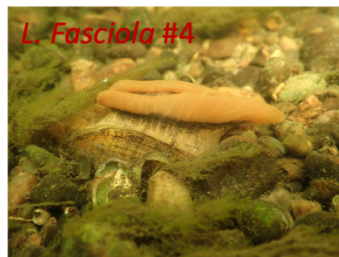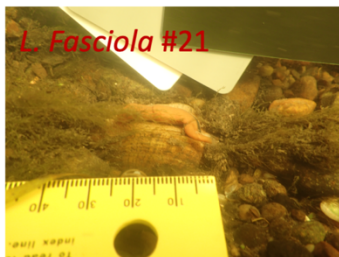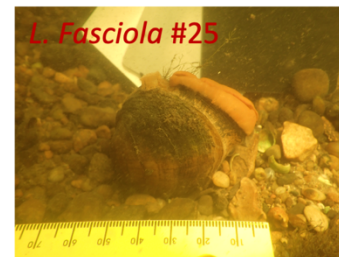

Supplementary Figure 1: Photographs from 27 *Lampsilis fasciola* lures taken at Sharon Mills (Fig. 2a) in Summer of 2017. Groups are defined by morphological similarity and individual numbers refer to order in which photographs were taken.

**Mussel brood notes**

Date : 7-13-09  
 Species: L. fasciola  
 Source: Paint Rock R.

| ID number | Length (mm) | Width (mm) | Height (mm) | Mass (g) |
|-----------|-------------|------------|-------------|----------|
| LF01      | 54          | 26         | 38          | 32.32    |

\* Bright orange and black mantle lure \*

A. Suspension volume (ml): 250 (Adjust to give ~20 per drop)

| Drop # | Undeveloped eggs | Open glochidia | Closed glochidia | Open after salt |
|--------|------------------|----------------|------------------|-----------------|
| 1      |                  | 29             | 0                | 1               |
| 2      |                  | 28             | 1                | 1               |
| 3      |                  | 22             | 1                | 1               |
| 4      |                  | 20             | 1                | 1               |
| 5      |                  | 23             | 3                | 0               |
| 6      |                  | 17             | 1                | 1               |
| 7      |                  | 18             | 0                | 0               |
| 8      |                  | 29             | 3                | 0               |
| 9      |                  | 26             | 2                | 0               |
| 10     |                  | 26             | 4                | 1               |
| Sums   | B                | C 258          | D 16             | E 6             |

Total glochidia = (C + D) \* A/2 = 31750

Viable glochidia = (C - E) \* A/2 = 29000

91% viable glo

7.25 L

29 REB

Supplementary Figure 2: Alabama Aquatic Biodiversity Center data sheet documenting the mantle lure phenotype (bracketed with red \*s) and the larval brood size of the gravid Paint Rock River female *Lampsilis fasciola* used to establish the inaugural AABC cultured unionid brood in 2009.

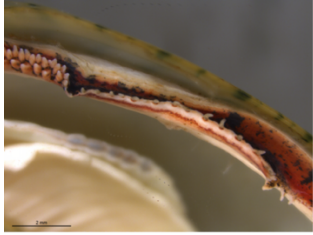

Darter\_01

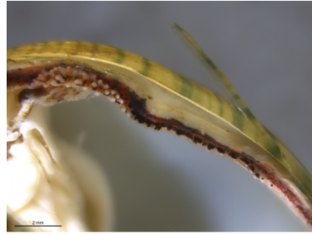

Darter\_05

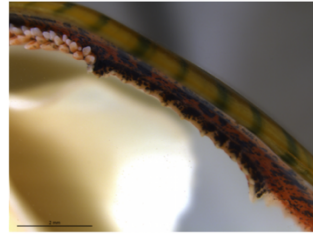

Darter\_09

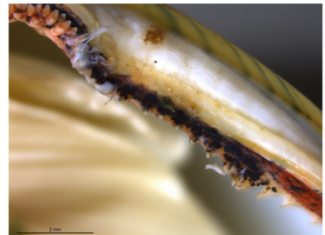

Darter\_13

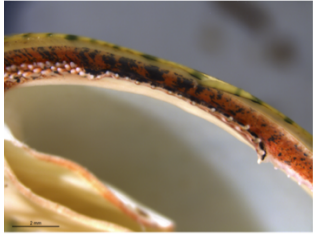

Darter\_02

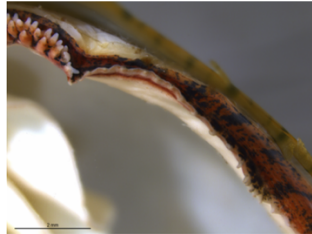

Darter\_06

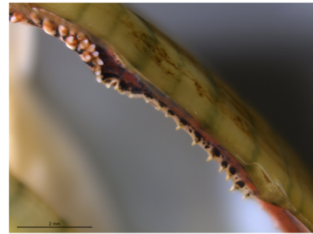

Darter\_10

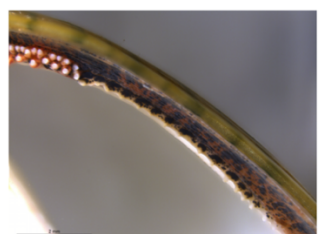

Darter\_14

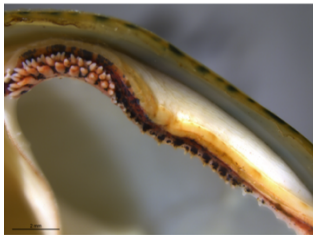

Darter\_03

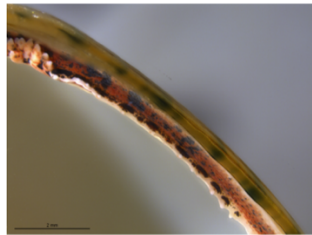

Darter\_07

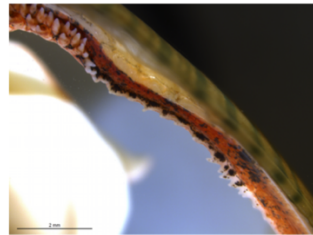

Darter\_11

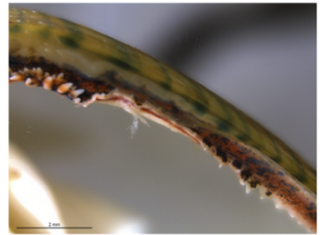

Darter\_15

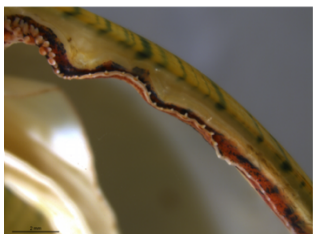

Darter\_04

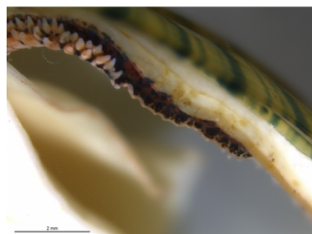

Darter\_08

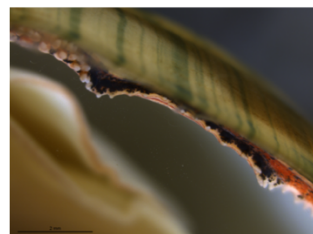

Darter\_12

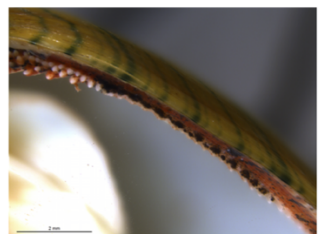

Darter\_16

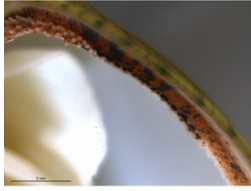

Darter\_17

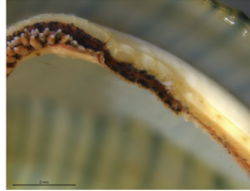

Darter\_21

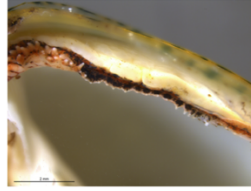

Darter\_25

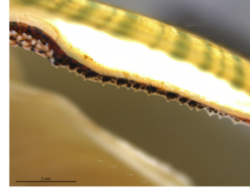

Darter\_29

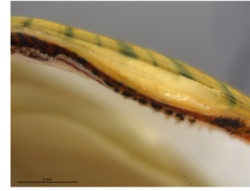

Darter\_33

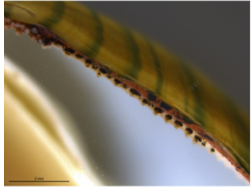

Darter\_18

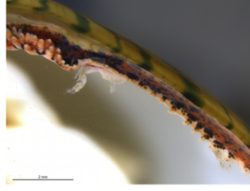

Darter\_22

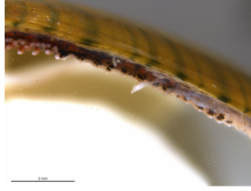

Darter\_26

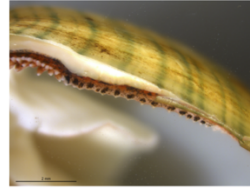

Darter\_30

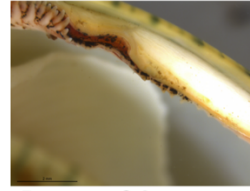

Darter\_34

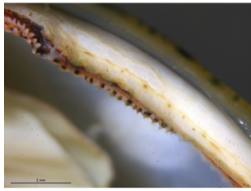

Darter\_19

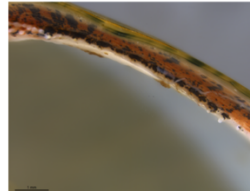

Darter\_23

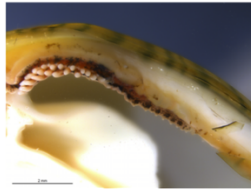

Darter\_27

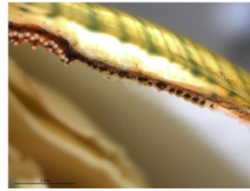

Darter\_31

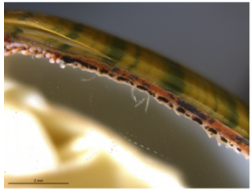

Darter\_20

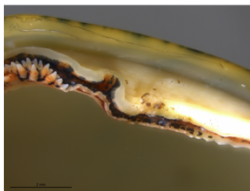

Darter\_24

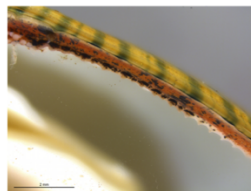

Darter\_28

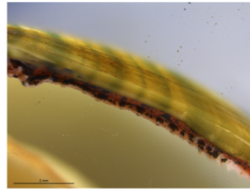

Darter\_32

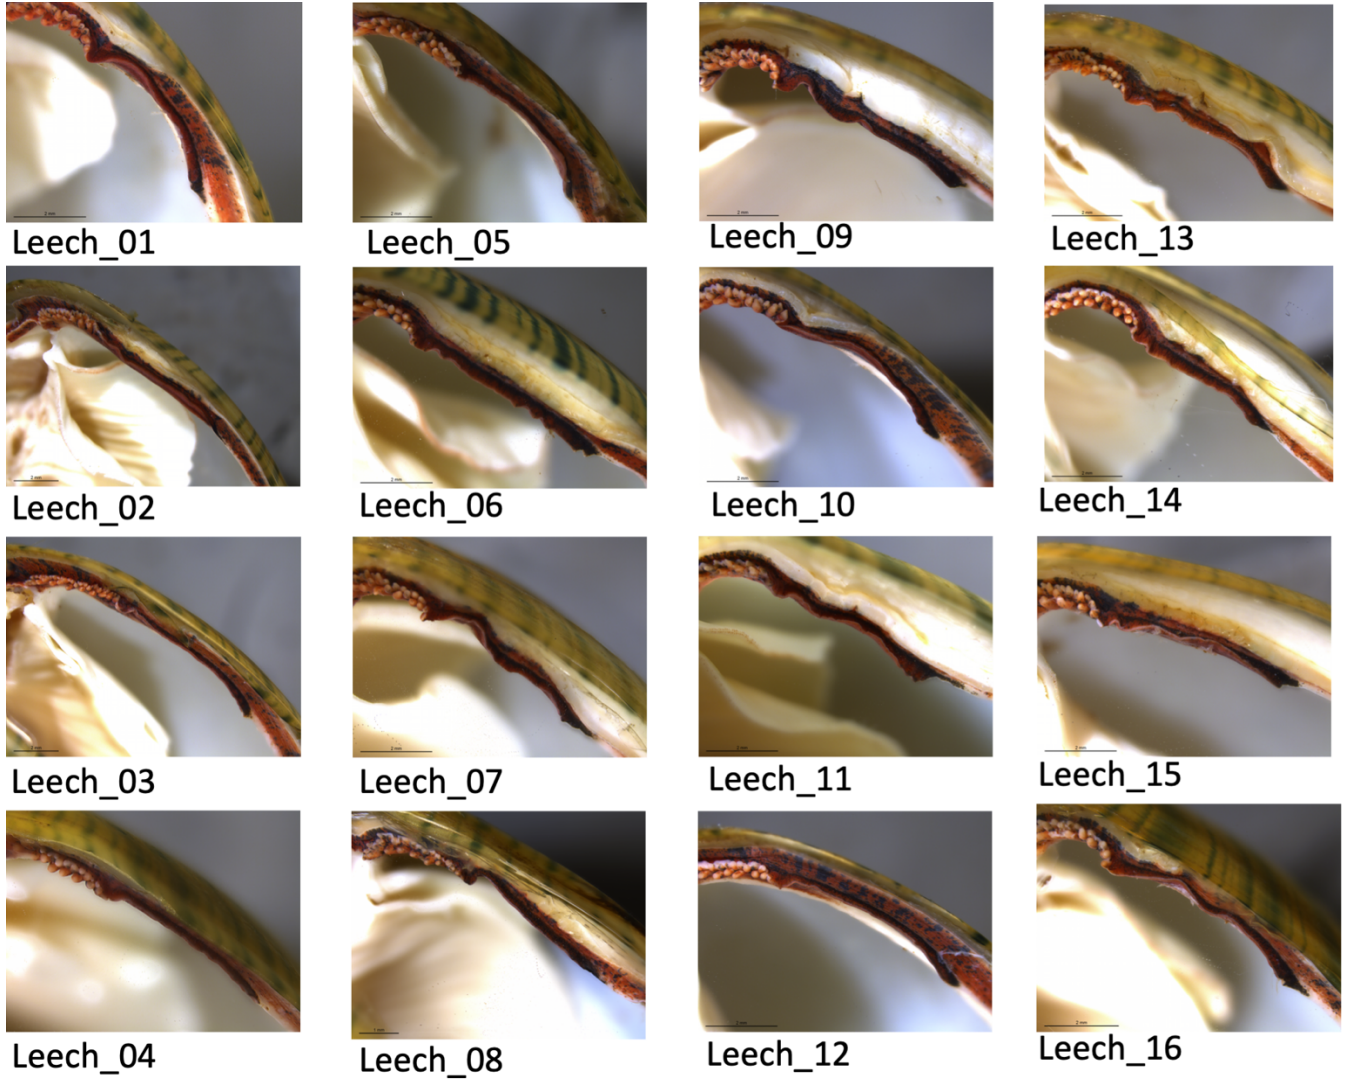

Supplementary Figure 3: Photographs of *Lampsilis fasciola* lure structure taken from 50 full or half-siblings raised from a single gravid female at the Alabama Aquatic Biodiversity Center in 2009. Each individual is categorized based on whether it has a darter-like or worm-like lure phenotype.

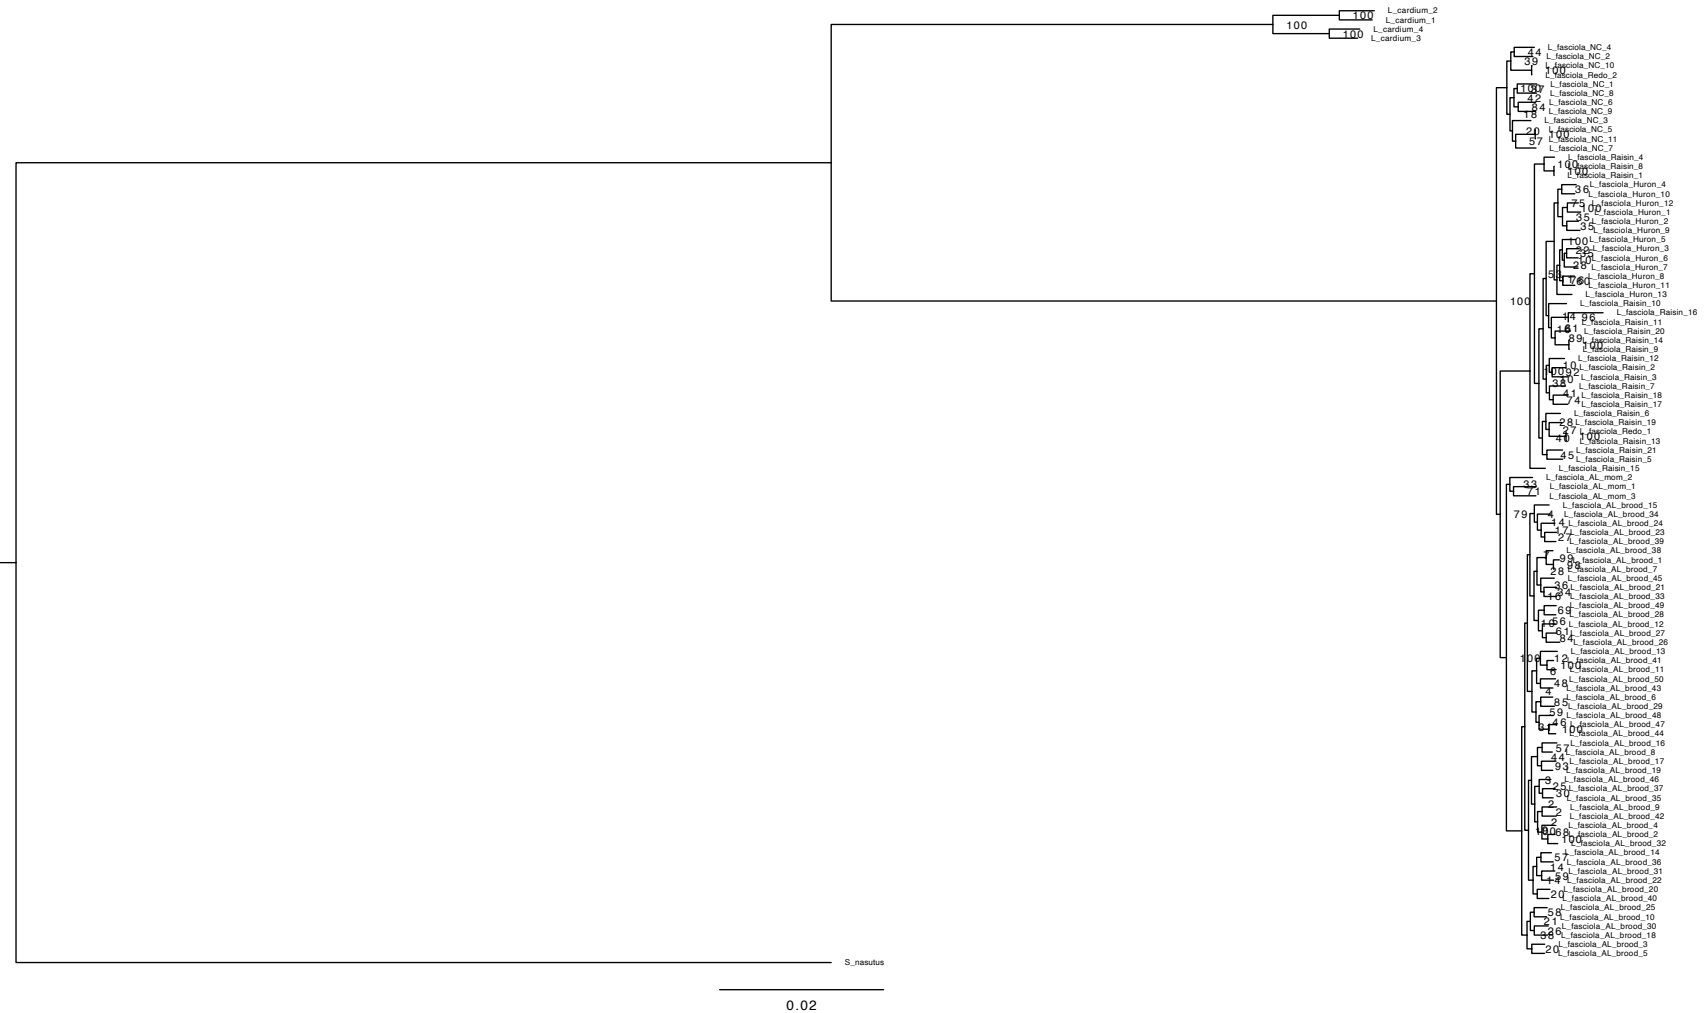

Supplementary Figure 4: Maximum likelihood phylogeny of *Lampsilis fasciola* mussels created with RAxML v8.2.8 using a general time reversible model. Support for each node was determined using 100 fast parametric bootstrap replications. Bootstrap values are adjacent to each node. Scale bar represents mean number of base pair substitutions per site.

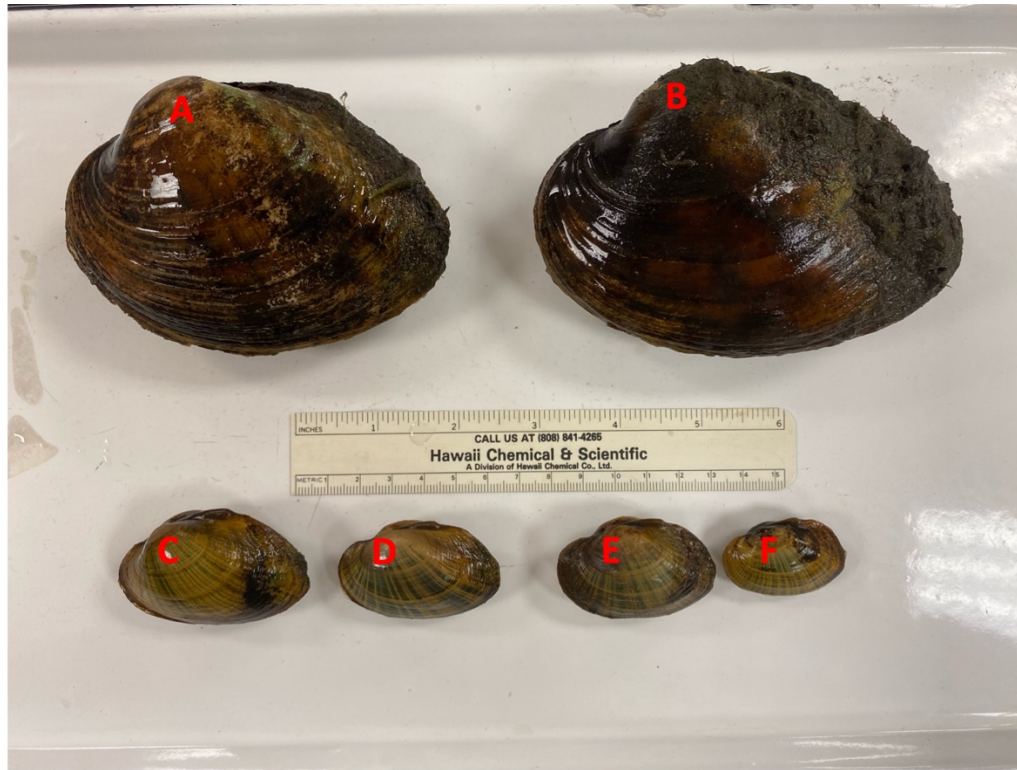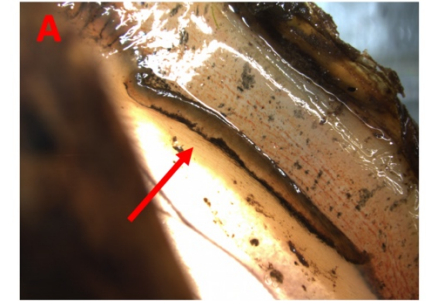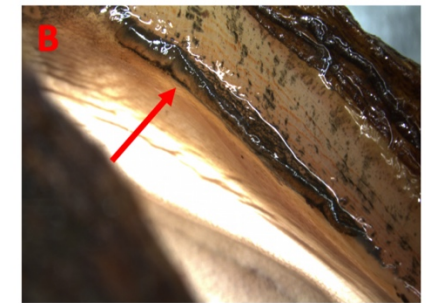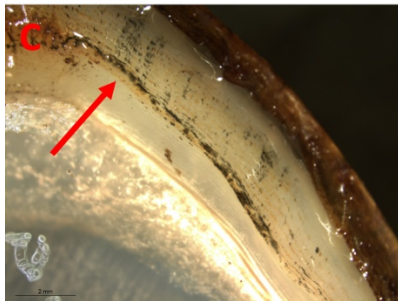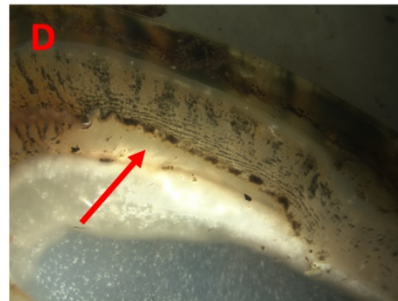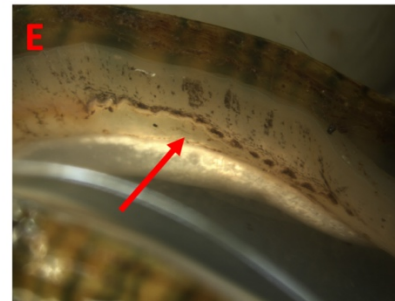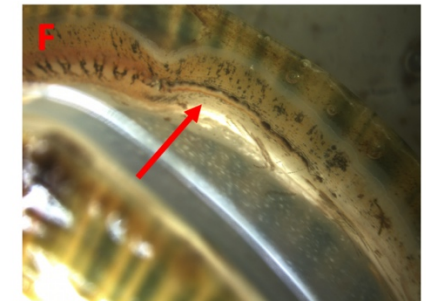

Supplementary Figure 5: A group photograph of 6 River Raisin Sharon Mills (MI) male lampsiline mussels - 2 *Lampsilis cardium* (A, B) and 4 *Lampsilis fasciola* (C-F) taken in May 2023 - together with individual photographs of their respective right mantle lure rudiments (arrows). All 4 *L. fasciola* mantle lures were "darter-like" with mottled coloration and minute marginal extensions.



**GH010599**  
**Darter**

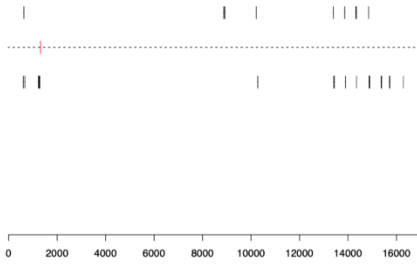

**GH010603**  
**Darter**

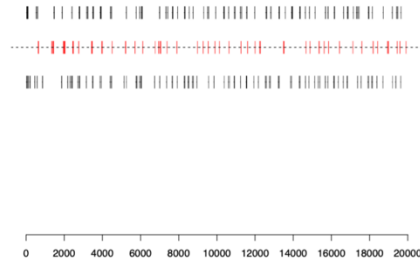

**GH010598**  
**Darter**

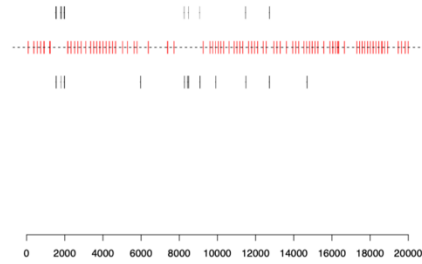

**GH010056**  
**Darter**

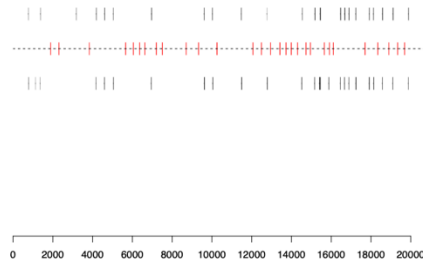

**GH010077**  
**Darter**

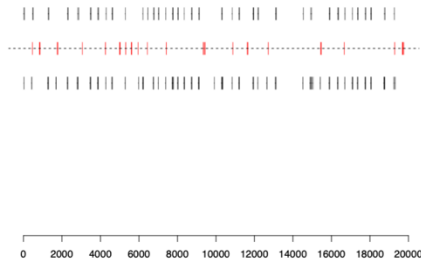

**GH010055**  
**Darter**

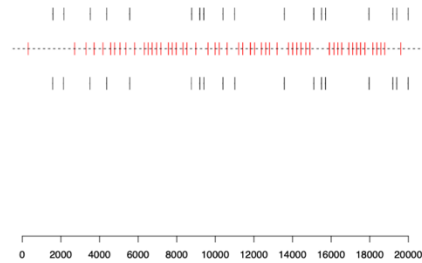

**GH010016**  
**Darter**

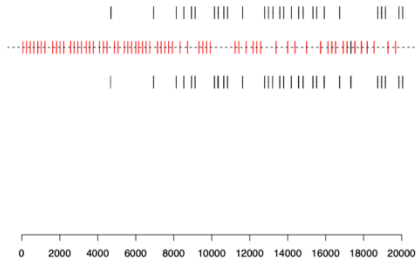

**GH010057**  
**Darter**

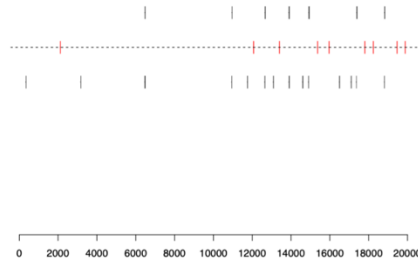

**GH010062**  
**Darter**

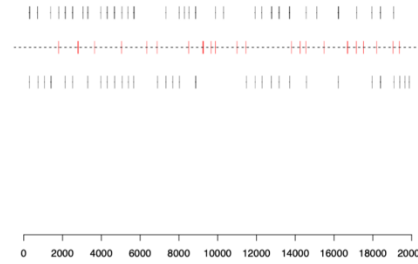

**GH010065**  
**Darter**

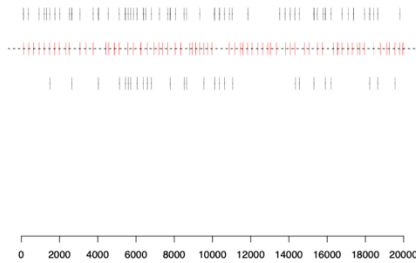

**GH010063**  
**Darter**

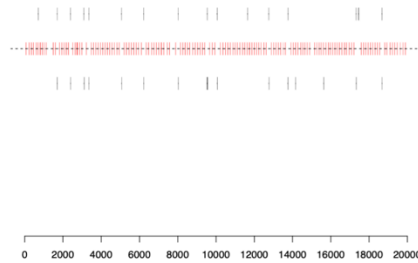

**GH010582**  
**Darter**

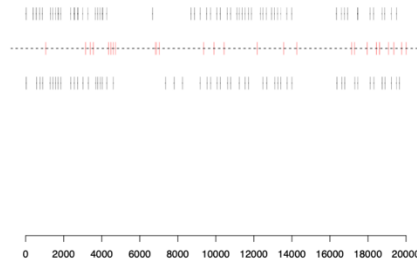

**GH010583**  
**Darter**

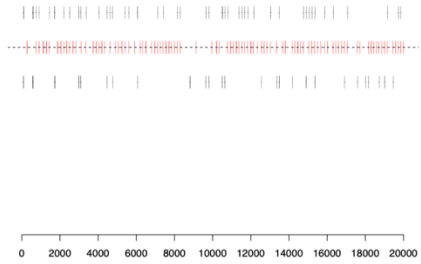

**GH010068**  
**Darter**

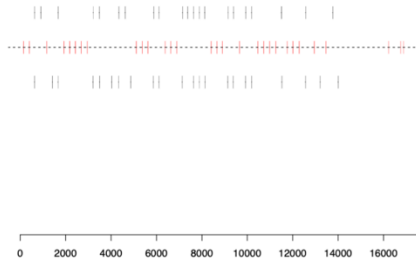

**GH010048**  
**Darter**

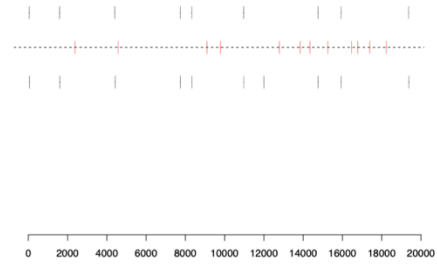

**GH010073**

**Leech**

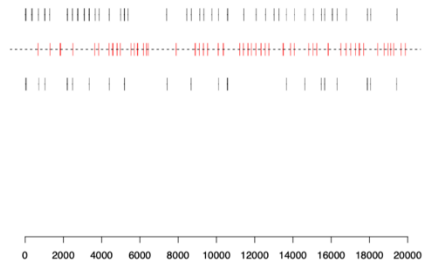

**GH010074**

**Leech**

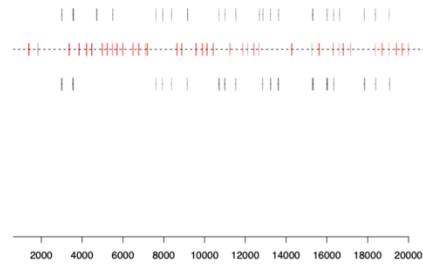

**GH010601**

**Leech**

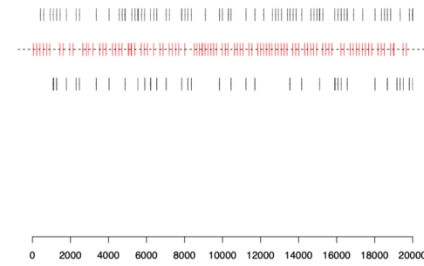

**GH010602**

**Leech**

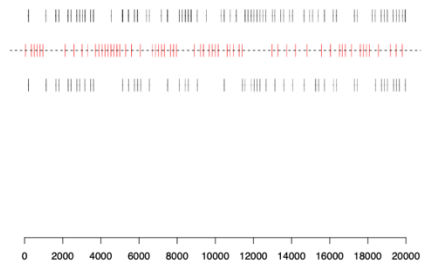

**GH010075**

**Leech**

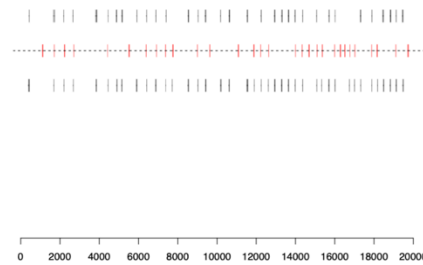

**GH010597**

**Leech**

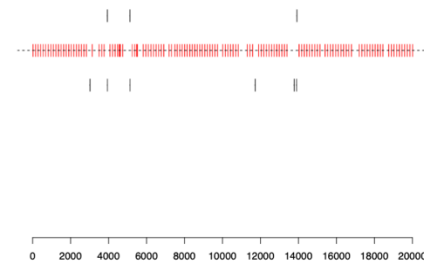

**GH010595**

**Leech**

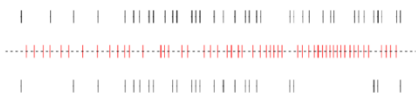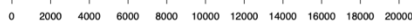

**GH010593**

**Leech**

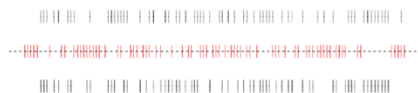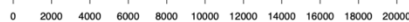

**GH010064**

**Leech**

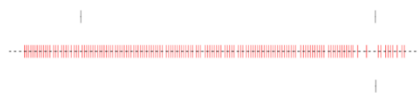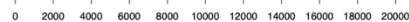

**GH010579**

**Leech**

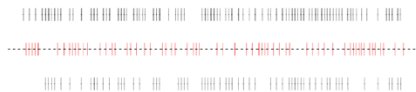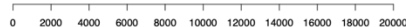

**GH010580**

**Leech**

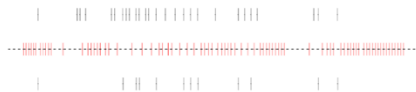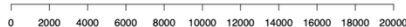

**GH010581**

**Leech**

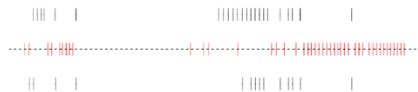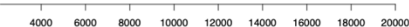

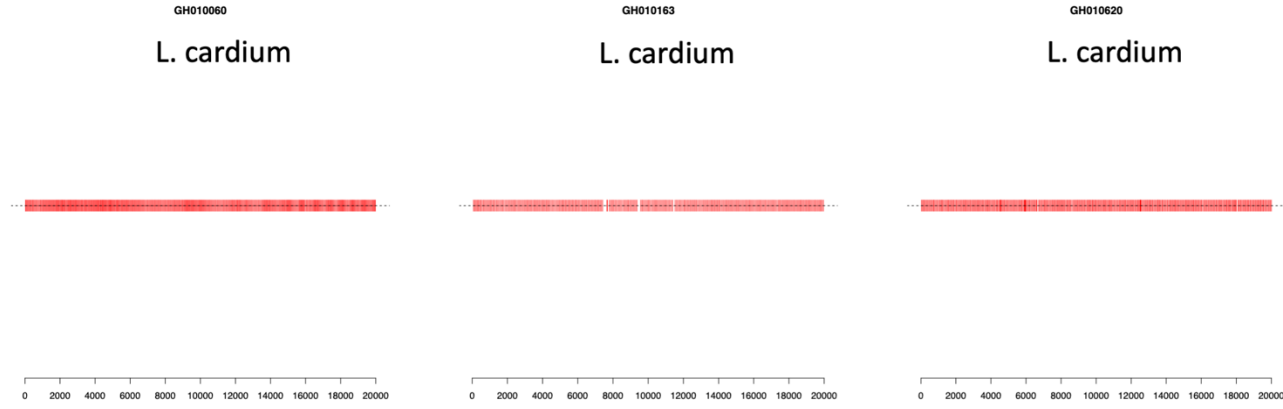

Supplementary Figure 6: Gait analyses for *Lampsilis fasciola* and *Lampsilis cardium* lure behavior. X axis denotes frame number. Videos were taken in Summer of 2018 from Sharon Mills (Fig. 2a) and Hudson Mills (Fig. 2b). Red lines on the center dotted line represent synchronized left/right movements, and black lines above the center line represent left side movements and below represent right side movements. Each graph is labelled as either a darter-like *L. fasciola*, leech-like *L. fasciola*, or *L. cardium*.
